# Supplementary material
Source: PubMed Central journal article supplement (PMC3993134)
Supplement: AEM.04206-13_zam999105242so1.pdf [file AEM.04206-13_zam999105242so1.pdf]

**SUPPLEMENTARY INFORMATION**

**The cockroach origin of the termite gut microbiota:  
patterns in bacterial community structure reflect major  
evolutionary events**

Carsten Dietrich, Tim Köhler & Andreas Brune

Department of Biogeochemistry, Max Planck Institute for Terrestrial Microbiology,  
Karl-von-Frisch-Strasse 10, 35043 Marburg, Germany

## Table of contents

- FIG S1** Relative abundance of sequence reads assigned to the major bacterial phyla in the gut microbiota of cockroaches, lower termites and higher termites.
- FIG S2** Comparison of bacterial community structure in cockroaches and termites using various ordination techniques and taxon-independent (OTU-based) approaches.
- FIG S3** Interactive version of the ternary plot of the distribution of genus-level taxa across the major host groups (Fig. 4). In the interactive version of the figure, the name of the genus-level bin is shown when the mouse is placed over the respective data points (tested with current versions of Internet Explorer, Firefox, and Chrome). **Please download Fig\_S3.svg for viewing.**
- FIG S4** Detailed phylogenetic trees of selected genus-level lineages in the gut microbiota that contribute strongly to the separation of cockroaches, lower termites, and higher termites (Fig. 3). **Please download Fig\_S4.pdf for viewing.**
- TABLE S1** Interactive spreadsheet with the classification results for all samples (relative abundance of reads at different phylogenetic levels). **Please download Table\_S1.xlsx for interactive spreadsheet.**
- TABLE S2** Classification success at different taxonomic levels for all insects included in this study.
- TABLE S3** Contribution of the 100 most important genus-level taxa to the separation of cockroaches, lower termites, and higher termites in the ordination analyses. The taxa are ranked in order of their contribution, and their cumulative abundance among the total reads of all samples and their representation among the three major host lineages are given. Taxa represented by > 70% of the species in a host group were considered core lineages (marked in bold).

## Figures

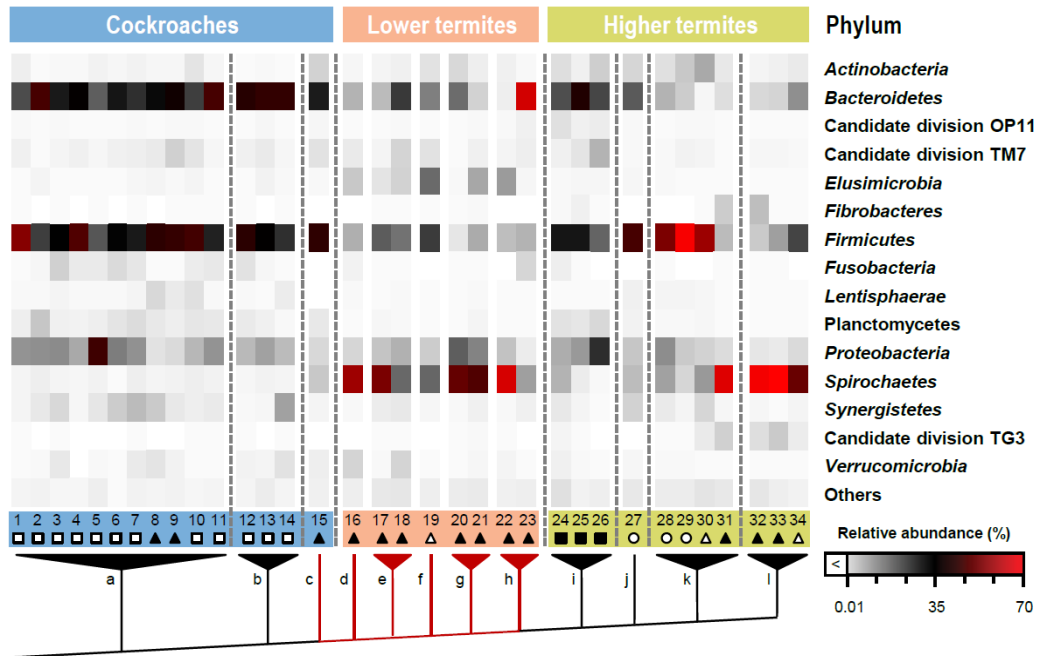

**FIG S1** Relative abundance of sequence reads assigned to the major bacterial phyla in the gut microbiota of cockroaches, lower termites, and higher termites. The color scale is linear. Numbers indicate host species (see Table 1 or Table S2). Symbols indicate lifestyle: (□), wood feeding (▲), grass feeding (Δ), soil/humus feeding (○), and fungus cultivating (■). The schematic tree shows a simplified host phylogeny of the major host lineages (a, other cockroaches; b, *Blattidae*; c, *Cryptocercidae*; d, *Mastotermitidae*; e, *Termopsidae*; f, *Hodotermitidae*; g, *Kalotermitidae*; h, *Rhinotermitidae*; i, *Macrotermitinae*; j, *Apicotermitinae*; k, *Termitinae*; l, *Nasutitermitinae*). The red branches mark the presence of cellulose-digesting flagellates.

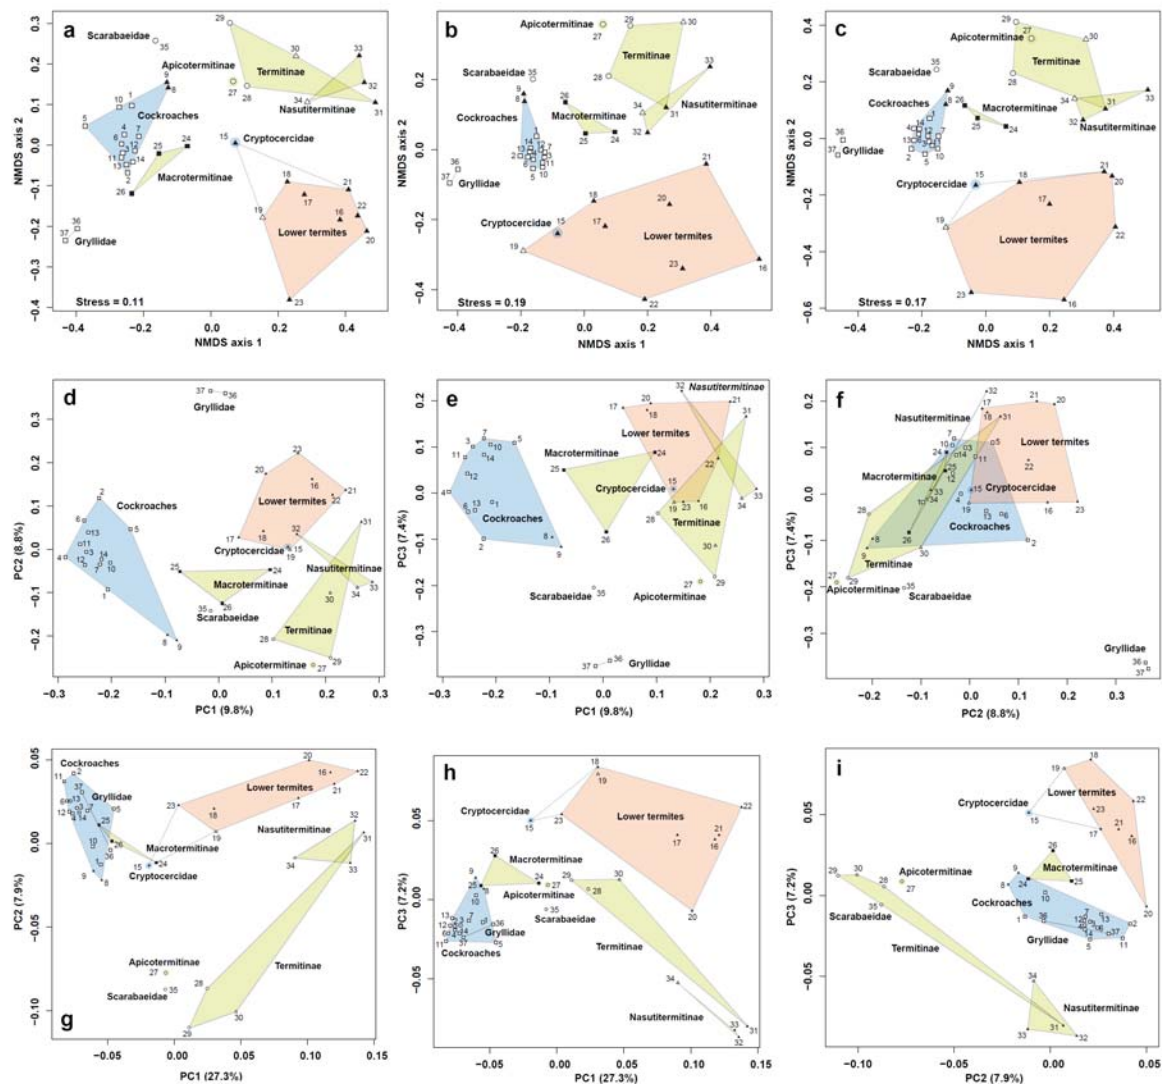

**FIG S2** Comparison of bacterial community structure in cockroaches and termites using various ordination techniques and taxon-independent (OTU-based) approaches. Non-metric multidimensional scaling (NMDS) of a pairwise Bray-Curtis dissimilarity distance matrix based on genus-level taxa (**a**) (relative abundance of 16S rRNA genes) or on the distribution of operational taxonomic units (OTUs) with 3% (**b**) and 5% sequence divergence (**c**). Principal coordinate analysis of the unweighted (**d-f**) and weighted (**g-i**) UniFrac distance matrix (normalized dataset); the variance explained by the three principal coordinates (PC) is indicated on the respective axes. Numbers indicate host species (see Table 1 or Table S2). Clustering of cockroaches, lower termites and different subfamilies of higher termites was significant ( $p < 0.001$ ).

## Tables

**TABLE S1** Excel table containing information with the classification results for all samples (relative abundance of reads at different phylogenetic levels). **Please download Table\_S1.xlsx for interactive spreadsheet.**

**TABLE S2** Classification success at different taxonomic levels for all insects included in this study.

| No.                   | Host species                      | Classified (%) |       |       |        |       |
|-----------------------|-----------------------------------|----------------|-------|-------|--------|-------|
|                       |                                   | Phylum         | Class | Order | Family | Genus |
| <b>Cockroaches</b>    |                                   |                |       |       |        |       |
| 1                     | <i>Ergaula capucina</i>           | 99.3           | 96.1  | 93.1  | 88.0   | 61.6  |
| 2                     | <i>Symploce macroptera</i>        | 99.5           | 98.7  | 90.1  | 82.5   | 70.8  |
| 3                     | <i>Rhyarobia maderae</i>          | 99.4           | 97.2  | 94.2  | 83.5   | 67.4  |
| 4                     | <i>Elliptorhina chopardi</i>      | 99.6           | 97.2  | 95.3  | 87.3   | 65.1  |
| 5                     | <i>Panchlora</i> sp.              | 99.1           | 97.2  | 92.7  | 86.5   | 73.5  |
| 6                     | <i>Diploptera punctata</i>        | 99.8           | 97.9  | 94.4  | 88.1   | 74.1  |
| 7                     | <i>Opisthoplatia orientalis</i>   | 99.0           | 95.8  | 89.6  | 83.9   | 63.3  |
| 8                     | <i>Panesthia angustipennis</i>    | 99.3           | 96.1  | 94.2  | 86.0   | 61.0  |
| 9                     | <i>Salganea esakii</i>            | 99.6           | 92.4  | 90.7  | 85.7   | 63.5  |
| 10                    | <i>Eublaberus posticus</i>        | 99.2           | 94.0  | 90.1  | 82.3   | 68.5  |
| 11                    | <i>Schultesia lampyridiformis</i> | 99.5           | 97.8  | 94.3  | 89.2   | 73.7  |
| 12                    | <i>Eurycotis floridana</i>        | 99.4           | 96.4  | 94.0  | 90.1   | 66.2  |
| 13                    | <i>Shelfordella lateralis</i>     | 99.4           | 95.3  | 93.5  | 90.1   | 74.6  |
| 14                    | <i>Blatta orientalis</i>          | 99.3           | 97.7  | 96.3  | 93.4   | 66.6  |
| 15                    | <i>Cryptocercus punctulatus</i>   | 99.0           | 93.4  | 90.2  | 82.8   | 67.7  |
| <b>Lower termites</b> |                                   |                |       |       |        |       |
| 16                    | <i>Mastotermes darwiniensis</i>   | 98.6           | 94.8  | 91.9  | 84.1   | 78.5  |
| 17                    | <i>Zootermopsis nevadensis</i>    | 97.9           | 90.1  | 88.3  | 76.0   | 70.0  |
| 18                    | <i>Hodotermopsis sjoestedti</i>   | 98.5           | 96.4  | 95.3  | 92.9   | 86.3  |
| 19                    | <i>Hodotermes mossambicus</i>     | 98.8           | 93.9  | 90.5  | 86.8   | 72.4  |
| 20                    | <i>Incisitermes marginipennis</i> | 99.2           | 98.3  | 97.3  | 94.9   | 91.4  |
| 21                    | <i>Neotermes jouteli</i>          | 99.3           | 95.7  | 92.2  | 86.8   | 81.8  |
| 22                    | <i>Reticulitermes santonensis</i> | 99.2           | 96.2  | 95.6  | 94.5   | 93.3  |
| 23                    | <i>Coptotermes niger</i>          | 98.2           | 94.2  | 93.8  | 92.7   | 91.0  |

| No.                    | Host species                      | Classified (%) |       |       |        |       |
|------------------------|-----------------------------------|----------------|-------|-------|--------|-------|
|                        |                                   | Phylum         | Class | Order | Family | Genus |
| <b>Higher termites</b> |                                   |                |       |       |        |       |
| 24                     | <i>Odontotermes</i> sp.           | 99.0           | 93.2  | 89.9  | 83.9   | 76.3  |
| 25                     | <i>Macrotermes</i> sp.            | 99.2           | 90.7  | 87.4  | 83.7   | 76.7  |
| 26                     | <i>Macrotermes subhyalinus</i>    | 99.9           | 86.4  | 81.0  | 72.6   | 66.1  |
| 27                     | <i>Alyscotermes trestus</i>       | 99.7           | 95.7  | 93.0  | 87.1   | 68.0  |
| 28                     | <i>Cubitermes ugandensis</i>      | 98.7           | 97.4  | 94.9  | 83.3   | 69.4  |
| 29                     | <i>Ophiotermes</i> sp.            | 99.8           | 97.4  | 95.2  | 90.6   | 73.7  |
| 30                     | <i>Amitermes meridionalis</i>     | 97.8           | 93.3  | 89.6  | 81.6   | 68.7  |
| 31                     | <i>Microcerotermes</i> sp.        | 99.2           | 98.3  | 96.8  | 93.2   | 87.7  |
| 32                     | <i>Nasutitermes corniger</i>      | 98.9           | 97.4  | 96.5  | 95.3   | 91.0  |
| 33                     | <i>Nasutitermes takasagoensis</i> | 98.8           | 97.7  | 97.0  | 94.9   | 88.9  |
| 34                     | <i>Trinervitermes</i> sp.         | 99.8           | 98.9  | 98.2  | 95.7   | 87.3  |
| <b>Others</b>          |                                   |                |       |       |        |       |
| 35                     | <i>Pachnoda ehippiata</i>         | 99.8           | 98.6  | 95.3  | 85.9   | 69.1  |
| 36                     | <i>Acheta domesticus</i>          | 99.7           | 99.4  | 98.0  | 96.0   | 79.8  |
| 37                     | <i>Gryllus assimilis</i>          | 99.9           | 99.7  | 97.0  | 94.9   | 75.4  |

**TABLE S3** Contribution of the 100 most important genus-level taxa to the separation of cockroaches, lower termites, and higher termites in the ordination analyses. The taxa are ranked in order of their contribution, and their cumulative abundance among the total reads of all samples and their representation among the three major host lineages are given. Taxa represented by > 70% of the species in a host group were considered core lineages (marked in bold). Taxa with core status for all hosts groups that were included in the community similarity analysis (Fig. 5) are indicated with grey shading.

| Rank | Phylum                | Family                    | Genus level         | No. of OTUs (3%) | Contribution (%) <sup>a</sup> |            | Read abundance (%) <sup>b</sup> | Representation in hosts (%) <sup>c</sup> |                |                 |
|------|-----------------------|---------------------------|---------------------|------------------|-------------------------------|------------|---------------------------------|------------------------------------------|----------------|-----------------|
|      |                       |                           |                     |                  | Individual                    | Cumulative |                                 | Cockroaches                              | Lower termites | Higher termites |
| 1    | <i>Spirochaetes</i>   | <i>Spirochaetaceae</i>    | <i>Treponema</i> Ia | 3907             | 5.5                           | 5.5        | 9.6                             | <b>87</b>                                | <b>100</b>     | <b>100</b>      |
| 2    | <i>Spirochaetes</i>   | <i>Spirochaetaceae</i>    | <i>Treponema</i> Ic | 901              | 3.6                           | 9.1        | 3.6                             | 47                                       | 63             | <b>100</b>      |
| 3    | <i>Bacteroidetes</i>  | <i>Rikenellaceae</i>      | <i>Alistipes</i> 2  | 969              | 3.5                           | 12.6       | 7.4                             | <b>100</b>                               | <b>100</b>     | <b>100</b>      |
| 4    | <i>Bacteroidetes</i>  | Cluster V                 | Subcluster Va       | 9                | 3.5                           | 16.1       | 1.8                             | 13                                       | 13             | 0               |
| 5    | <i>Spirochaetes</i>   | <i>Spirochaetaceae</i>    | <i>Treponema</i> Id | 42               | 2.2                           | 18.3       | 1.2                             | 0                                        | 50             | 18              |
| 6    | <i>Firmicutes</i>     | <i>Ruminococcaceae</i>    | Uncultured 24       | 326              | 2.0                           | 20.3       | 1.4                             | <b>87</b>                                | 63             | <b>100</b>      |
| 7    | <i>Elusimicrobia</i>  | <i>Endomicrobia</i>       | Endomicrobium       | 306              | 1.9                           | 22.3       | 2.4                             | <b>100</b>                               | <b>100</b>     | <b>91</b>       |
| 8    | <i>Spirochaetes</i>   | <i>Spirochaetaceae</i>    | <i>Treponema</i> If | 981              | 1.8                           | 24.1       | 1.9                             | 40                                       | 63             | <b>100</b>      |
| 9    | <i>Firmicutes</i>     | <i>Lachnospiraceae</i>    | Uncultured 65       | 1268             | 1.8                           | 25.9       | 3.9                             | <b>100</b>                               | <b>88</b>      | <b>100</b>      |
| 10   | <i>Proteobacteria</i> | <i>Campylobacteraceae</i> | <i>Arcobacter</i>   | 226              | 1.6                           | 27.5       | 1.1                             | 53                                       | 50             | 55              |

| Rank | Phylum                | Family                     | Genus level              | No. of OTUs<br>(3%) | Contribution (%) <sup>a</sup> |                 | Read<br>abund-<br>ance (%) <sup>b</sup> | Representation in hosts (%) <sup>c</sup> |                   |                    |
|------|-----------------------|----------------------------|--------------------------|---------------------|-------------------------------|-----------------|-----------------------------------------|------------------------------------------|-------------------|--------------------|
|      |                       |                            |                          |                     | Indivi-<br>dual               | Cumula-<br>tive |                                         | Cock-<br>roaches                         | Lower<br>termites | Higher<br>termites |
| 11   | <i>Bacteroidetes</i>  | <i>Blattabacteriaceae</i>  | <i>Blattabacterium</i>   | 665                 | 1.5                           | 29.0            | 2.2                                     | <b>100</b>                               | <b>75</b>         | 64                 |
| 12   | <i>Spirochaetes</i>   | <i>Spirochaetaceae</i>     | <i>Treponema</i> II      | 185                 | 1.5                           | 30.6            | 1.2                                     | 47                                       | <b>75</b>         | 55                 |
| 13   | <i>Bacteroidetes</i>  | <i>Bacteroidaceae</i>      | <i>Bacteroides</i>       | 286                 | 1.3                           | 31.9            | 1.5                                     | <b>100</b>                               | 63                | <b>73</b>          |
| 14   | <i>Bacteroidetes</i>  | <i>Rikenellaceae</i>       | <i>Alistipes</i> 1       | 422                 | 1.3                           | 33.2            | 1.7                                     | <b>93</b>                                | <b>75</b>         | <b>73</b>          |
| 15   | <i>Bacteroidetes</i>  | <i>Porphyromonadaceae</i>  | <i>Parabacteroides</i>   | 439                 | 1.2                           | 34.4            | 2.0                                     | <b>100</b>                               | <b>100</b>        | 64                 |
| 16   | <i>Bacteroidetes</i>  | <i>Porphyromonadaceae</i>  | <i>Dysgonomonas</i>      | 628                 | 1.2                           | 35.5            | 2.1                                     | <b>100</b>                               | <b>75</b>         | <b>91</b>          |
| 17   | <i>Firmicutes</i>     | <i>Lachnospiraceae</i>     | <i>Cand. Arthromitus</i> | 1647                | 1.0                           | 36.5            | 2.1                                     | <b>100</b>                               | <b>88</b>         | <b>100</b>         |
| 18   | <i>Bacteroidetes</i>  | Insect cluster I           | Insect Cluster           | 2                   | 1.0                           | 37.5            | 0.7                                     | 53                                       | 38                | 27                 |
| 19   | <i>Bacteroidetes</i>  | Cluster V                  | Subcluster Ve            | 1                   | 1.0                           | 38.4            | 1.5                                     | <b>100</b>                               | 50                | <b>73</b>          |
| 20   | <i>Proteobacteria</i> | <i>Desulfovibrionaceae</i> | <i>Desulfovibrio</i> 3   | 769                 | 1.0                           | 39.4            | 2.1                                     | <b>100</b>                               | <b>88</b>         | <b>100</b>         |
| 21   | <i>Firmicutes</i>     | <i>Ruminococcaceae</i>     | Insect Cluster 1         | 84                  | 0.9                           | 40.3            | 1.9                                     | <b>100</b>                               | 63                | <b>91</b>          |
| 22   | <i>Bacteroidetes</i>  | <i>Porphyromonadaceae</i>  | <i>Paludibacter</i>      | 98                  | 0.8                           | 41.1            | 1.8                                     | <b>100</b>                               | <b>100</b>        | <b>100</b>         |
| 23   | <i>Firmicutes</i>     | <i>Lachnospiraceae</i>     | Gut Cluster 2            | 1728                | 0.8                           | 41.9            | 1.8                                     | <b>100</b>                               | <b>100</b>        | <b>100</b>         |



| Rank | Phylum                | Family                     | Genus level            | No. of OTUs<br>(3%) | Contribution (%) <sup>a</sup> |                 | Read<br>abund-<br>ance (%) <sup>b</sup> | Representation in hosts (%) <sup>c</sup> |                   |                    |
|------|-----------------------|----------------------------|------------------------|---------------------|-------------------------------|-----------------|-----------------------------------------|------------------------------------------|-------------------|--------------------|
|      |                       |                            |                        |                     | Indivi-<br>dual               | Cumula-<br>tive |                                         | Cock-<br>roaches                         | Lower<br>termites | Higher<br>termites |
| 24   | <i>Actinobacteria</i> | <i>Corynebacteriaceae</i>  | <i>Corynebacterium</i> | 8                   | 0.8                           | 42.7            | 0.5                                     | 53                                       | 25                | 18                 |
| 25   | <i>Firmicutes</i>     | <i>Ruminococcaceae</i>     | Gut Cluster 1          | 61                  | 0.8                           | 43.5            | 1.7                                     | <b>100</b>                               | <b>88</b>         | <b>100</b>         |
| 26   | TG3                   | Termite cluster            | Termite Cluster I      | 286                 | 0.8                           | 44.3            | 0.6                                     | 47                                       | 38                | <b>82</b>          |
| 27   | <i>Firmicutes</i>     | <i>Ruminococcaceae</i>     | Uncultured 23          | 407                 | 0.7                           | 45.0            | 0.6                                     | 67                                       | 50                | <b>82</b>          |
| 28   | <i>Synergistetes</i>  | <i>Synergistaceae</i>      | Uncultured 6           | 297                 | 0.7                           | 45.7            | 1.2                                     | <b>100</b>                               | <b>100</b>        | <b>100</b>         |
| 29   | <i>Firmicutes</i>     | <i>Ruminococcaceae</i>     | <i>Anaerotruncus</i>   | 110                 | 0.7                           | 46.3            | 0.8                                     | <b>100</b>                               | <b>75</b>         | <b>100</b>         |
| 30   | <i>Proteobacteria</i> | <i>Rhodocyclaceae</i> 3    | Termite cluster        | 157                 | 0.6                           | 47.0            | 0.4                                     | 40                                       | <b>75</b>         | 55                 |
| 31   | <i>Firmicutes</i>     | Family XIII                | Uncultured 5           | 269                 | 0.6                           | 47.6            | 1.2                                     | <b>100</b>                               | <b>100</b>        | <b>100</b>         |
| 32   | <i>Firmicutes</i>     | <i>Lachnospiraceae</i>     | <i>Robinsoniella</i>   | 1                   | 0.6                           | 48.2            | 0.4                                     | 20                                       | 25                | 64                 |
| 33   | <i>Firmicutes</i>     | <i>Ruminococcaceae</i>     | Uncultured 12          | 529                 | 0.6                           | 48.8            | 1.3                                     | <b>93</b>                                | <b>100</b>        | <b>100</b>         |
| 34   | <i>Firmicutes</i>     | <i>Streptococcaceae</i>    | <i>Lactococcus</i> 1   | 10                  | 0.6                           | 49.3            | 0.5                                     | <b>73</b>                                | 50                | 64                 |
| 35   | <i>Bacteroidetes</i>  | <i>Flavobacteriaceae</i> 2 | Uncultured a           | 113                 | 0.5                           | 49.9            | 0.4                                     | 40                                       | 50                | 18                 |
| 36   | <i>Firmicutes</i>     | <i>Ruminococcaceae</i>     | Uncultured 30          | 762                 | 0.5                           | 50.4            | 0.9                                     | <b>93</b>                                | <b>88</b>         | <b>100</b>         |

| Rank | Phylum                | Family                  | Genus level                  | No. of OTUs<br>(3%) | Contribution (%) <sup>a</sup> |                 | Read<br>abund-<br>ance (%) <sup>b</sup> | Representation in hosts (%) <sup>c</sup> |                   |                    |
|------|-----------------------|-------------------------|------------------------------|---------------------|-------------------------------|-----------------|-----------------------------------------|------------------------------------------|-------------------|--------------------|
|      |                       |                         |                              |                     | Indivi-<br>dual               | Cumula-<br>tive |                                         | Cock-<br>roaches                         | Lower<br>termites | Higher<br>termites |
| 37   | <i>Bacteroidetes</i>  | Cluster V               | Subcluster Vb                | 7                   | 0.5                           | 50.9            | 0.5                                     | 7                                        | 13                | <b>91</b>          |
| 38   | <i>Fibrobacteres</i>  | Termite cluster         | Termite cluster II           | 181                 | 0.5                           | 51.4            | 0.3                                     | 40                                       | 50                | <b>73</b>          |
| 39   | <i>Firmicutes</i>     | <i>Ruminococcaceae</i>  | Uncultured 36                | 632                 | 0.5                           | 51.8            | 0.9                                     | <b>100</b>                               | 50                | <b>100</b>         |
| 40   | <i>Proteobacteria</i> | <i>Acetobacteraceae</i> | <i>Acidisoma</i>             | 4                   | 0.5                           | 52.3            | 0.2                                     | 20                                       | 0                 | 9                  |
| 41   | <i>Fusobacteria</i>   | <i>Leptotrichiaceae</i> | <i>Sebaldella</i>            | 103                 | 0.4                           | 52.7            | 0.5                                     | <b>80</b>                                | 63                | 55                 |
| 42   | <i>Bacteroidetes</i>  | <i>Rikenellaceae</i>    | <i>Alistipes</i>             | 42                  | 0.4                           | 53.2            | 0.4                                     | <b>73</b>                                | 25                | 55                 |
| 43   | <i>Bacteroidetes</i>  | <i>Marinilabiaceae</i>  | Uncultured 1                 | 74                  | 0.4                           | 53.6            | 0.5                                     | <b>93</b>                                | 38                | 27                 |
| 44   | <i>Firmicutes</i>     | <i>Lactobacillaceae</i> | <i>Lactobacillus</i> 5       | 43                  | 0.4                           | 54.0            | 0.3                                     | 60                                       | 38                | 0                  |
| 45   | <i>Proteobacteria</i> | <i>Neisseriaceae</i> 1  | Uncultured a                 | 1                   | 0.4                           | 54.4            | 0.2                                     | 7                                        | 0                 | 0                  |
| 46   | <i>Firmicutes</i>     | <i>Veillonellaceae</i>  | Uncultured 7                 | 155                 | 0.4                           | 54.7            | 0.8                                     | <b>100</b>                               | <b>75</b>         | <b>73</b>          |
| 47   | <i>Spirochaetes</i>   | <i>Spirochaetaceae</i>  | <i>Spirochaeta</i> 1         | 73                  | 0.4                           | 55.1            | 0.4                                     | <b>73</b>                                | 50                | 55                 |
| 48   | <i>Firmicutes</i>     | <i>Enterococcaceae</i>  | <i>Enterococcus</i> 2        | 24                  | 0.4                           | 55.5            | 0.4                                     | <b>80</b>                                | 50                | 9                  |
| 49   | <i>Firmicutes</i>     | <i>Veillonellaceae</i>  | <i>Phascolarctobacterium</i> | 30                  | 0.4                           | 55.9            | 0.4                                     | 67                                       | 38                | 18                 |

| Rank | Phylum                 | Family                     | Genus level               | No. of OTUs<br>(3%) | Contribution (%) <sup>a</sup> |                 | Read<br>abund-<br>ance (%) <sup>b</sup> | Representation in hosts (%) <sup>c</sup> |                   |                    |
|------|------------------------|----------------------------|---------------------------|---------------------|-------------------------------|-----------------|-----------------------------------------|------------------------------------------|-------------------|--------------------|
|      |                        |                            |                           |                     | Indivi-<br>dual               | Cumula-<br>tive |                                         | Cock-<br>roaches                         | Lower<br>termites | Higher<br>termites |
| 50   | <i>Proteobacteria</i>  | <i>Desulfovibrionaceae</i> | <i>Desulfovibrio</i> TC I | 78                  | 0.4                           | 56.3            | 0.4                                     | 47                                       | <b>100</b>        | 36                 |
| 51   | <i>Fibrobacteres</i>   | <i>Termite cluster</i>     | Termite cluster I         | 166                 | 0.4                           | 56.6            | 0.3                                     | 13                                       | 25                | <b>73</b>          |
| 52   | <i>Bacteroidetes</i>   | <i>Porphyromonadaceae</i>  | Cockroach cluster         | 1                   | 0.4                           | 57.0            | 0.4                                     | <b>80</b>                                | 38                | 27                 |
| 53   | <i>Proteobacteria</i>  | Cluster 1                  | Insect cluster            | 1                   | 0.4                           | 57.3            | 0.6                                     | <b>100</b>                               | 38                | 55                 |
| 54   | <i>Firmicutes</i>      | <i>Lactobacillaceae</i>    | <i>Lactobacillus</i> 2    | 12                  | 0.3                           | 57.7            | 0.3                                     | 53                                       | 25                | 55                 |
| 55   | <i>Verrucomicrobia</i> | <i>Verrucomicrobiaceae</i> | <i>Akkermansia</i>        | 19                  | 0.3                           | 58.0            | 0.4                                     | 60                                       | 25                | 18                 |
| 56   | <i>Bacteroidetes</i>   | <i>Rikenellaceae</i>       | Insect cluster            | 2                   | 0.3                           | 58.3            | 0.4                                     | <b>100</b>                               | <b>100</b>        | <b>73</b>          |
| 57   | <i>Synergistetes</i>   | <i>Synergistaceae</i>      | Uncultured 2              | 14                  | 0.3                           | 58.7            | 0.2                                     | 47                                       | 13                | 0                  |
| 58   | <i>Bacteroidetes</i>   | <i>Porphyromonadaceae</i>  | <i>Odoribacter</i>        | 26                  | 0.3                           | 59.0            | 0.2                                     | 40                                       | 25                | 27                 |
| 59   | <i>Firmicutes</i>      | <i>Lactobacillaceae</i>    | <i>Lactobacillus</i> 4    | 17                  | 0.3                           | 59.3            | 0.4                                     | 67                                       | 25                | 9                  |
| 60   | <i>Firmicutes</i>      | <i>Lachnospiraceae</i>     | Gut cluster 1             | 61                  | 0.3                           | 59.6            | 0.5                                     | <b>100</b>                               | 63                | 55                 |
| 61   | <i>Firmicutes</i>      | <i>Ruminococcaceae</i>     | <i>Papillibacter</i>      | 143                 | 0.3                           | 59.8            | 0.5                                     | <b>87</b>                                | <b>75</b>         | <b>91</b>          |
| 62   | <i>Actinobacteria</i>  | <i>Coriobacteriaceae</i>   | Uncultured 10             | 170                 | 0.3                           | 60.1            | 0.6                                     | <b>93</b>                                | <b>100</b>        | <b>100</b>         |

| Rank | Phylum                | Family                     | Genus level                     | No. of OTUs<br>(3%) | Contribution (%) <sup>a</sup> |                 | Read<br>abund-<br>ance (%) <sup>b</sup> | Representation in hosts (%) <sup>c</sup> |                   |                    |
|------|-----------------------|----------------------------|---------------------------------|---------------------|-------------------------------|-----------------|-----------------------------------------|------------------------------------------|-------------------|--------------------|
|      |                       |                            |                                 |                     | Indivi-<br>dual               | Cumula-<br>tive |                                         | Cock-<br>roaches                         | Lower<br>termites | Higher<br>termites |
| 63   | <i>Bacteroidetes</i>  | <i>Porphyromonadaceae</i>  | Higher termite cluster          | 2                   | 0.3                           | 60.4            | 0.2                                     | 13                                       | 0                 | 55                 |
| 64   | TG3                   | Termite cluster            | Termite cluster II              | 152                 | 0.3                           | 60.6            | 0.2                                     | 7                                        | 13                | <b>73</b>          |
| 65   | <i>Proteobacteria</i> | <i>Campylobacteraceae</i>  | <i>Sulfurospirillum</i>         | 125                 | 0.3                           | 60.9            | 0.3                                     | 53                                       | 50                | 55                 |
| 66   | <i>Bacteroidetes</i>  | <i>Porphyromonadaceae</i>  | <i>Tannerella</i>               | 209                 | 0.2                           | 61.1            | 0.4                                     | <b>93</b>                                | 63                | <b>100</b>         |
| 67   | <i>Bacteroidetes</i>  | <i>Porphyromonadaceae</i>  | <i>Bacteroidales</i> Cluster Vg | 23                  | 0.2                           | 61.4            | 0.5                                     | <b>100</b>                               | <b>88</b>         | <b>82</b>          |
| 68   | <i>Firmicutes</i>     | <i>Enterococcaceae</i>     | <i>Enterococcus</i> 7           | 2                   | 0.2                           | 61.6            | 0.1                                     | 20                                       | 0                 | 0                  |
| 69   | <i>Firmicutes</i>     | <i>Peptococcaceae</i>      | Uncultured 2                    | 10                  | 0.2                           | 61.9            | 0.4                                     | <b>93</b>                                | 50                | <b>82</b>          |
| 70   | <i>Proteobacteria</i> | <i>Enterobacteriaceae</i>  | <i>Pragia</i>                   | 8                   | 0.2                           | 62.1            | 0.1                                     | 7                                        | 13                | 0                  |
| 71   | <i>Firmicutes</i>     | <i>Ruminococcaceae</i>     | Uncultured 35                   | 380                 | 0.2                           | 62.3            | 0.4                                     | <b>87</b>                                | <b>88</b>         | <b>100</b>         |
| 72   | <i>Proteobacteria</i> | <i>Desulfobulbaceae</i>    | <i>Desulfobulbus</i>            | 80                  | 0.2                           | 62.5            | 0.4                                     | <b>93</b>                                | 38                | <b>82</b>          |
| 73   | <i>Firmicutes</i>     | <i>Ruminococcaceae</i>     | Incertae Sedis 1                | 1                   | 0.2                           | 62.7            | 0.2                                     | 60                                       | <b>88</b>         | <b>100</b>         |
| 74   | <i>Firmicutes</i>     | <i>Erysipelotrichaceae</i> | <i>Turicibacter</i>             | 59                  | 0.2                           | 62.9            | 0.3                                     | 0                                        | 13                | <b>91</b>          |
| 75   | <i>Firmicutes</i>     | <i>Ruminococcaceae</i>     | Uncultured 28                   | 97                  | 0.2                           | 63.1            | 0.4                                     | <b>87</b>                                | 50                | <b>73</b>          |

| Rank | Phylum                | Family                    | Genus level                     | No. of OTUs<br>(3%) | Contribution (%) <sup>a</sup> |                 | Read<br>abund-<br>ance (%) <sup>b</sup> | Representation in hosts (%) <sup>c</sup> |                   |                    |
|------|-----------------------|---------------------------|---------------------------------|---------------------|-------------------------------|-----------------|-----------------------------------------|------------------------------------------|-------------------|--------------------|
|      |                       |                           |                                 |                     | Indivi-<br>dual               | Cumula-<br>tive |                                         | Cock-<br>roaches                         | Lower<br>termites | Higher<br>termites |
| 76   | <i>Firmicutes</i>     | <i>Ruminococcaceae</i>    | Uncultured 25                   | 115                 | 0.2                           | 63.4            | 0.4                                     | <b>80</b>                                | <b>75</b>         | <b>100</b>         |
| 77   | <i>Proteobacteria</i> | <i>Enterobacteriaceae</i> | Enteric cluster                 | 38                  | 0.2                           | 63.6            | 0.2                                     | 60                                       | 63                | 45                 |
| 78   | <i>Firmicutes</i>     | <i>Streptococcaceae</i>   | <i>Lactovum</i>                 | 77                  | 0.2                           | 63.7            | 0.2                                     | 7                                        | 25                | <b>73</b>          |
| 79   | <i>Actinobacteria</i> | <i>Coriobacteriaceae</i>  | Marine group                    | 84                  | 0.2                           | 63.9            | 0.2                                     | 13                                       | 38                | 64                 |
| 80   | <i>Bacteroidetes</i>  | Insect cluster II         | Uncultured a                    | 79                  | 0.2                           | 64.1            | 0.4                                     | <b>87</b>                                | 50                | <b>91</b>          |
| 81   | <i>Proteobacteria</i> | <i>Desulfobacteraceae</i> | <i>Desulfatiferula</i>          | 52                  | 0.2                           | 64.3            | 0.3                                     | <b>93</b>                                | 63                | 36                 |
| 82   | <i>Spirochaetes</i>   | <i>Spirochaetaceae</i>    | Higher termite cluster          | 40                  | 0.2                           | 64.5            | 0.2                                     | 47                                       | <b>75</b>         | <b>91</b>          |
| 83   | <i>Firmicutes</i>     | <i>Lachnospiraceae</i>    | Incertae sedis 34               | 9                   | 0.2                           | 64.7            | 0.2                                     | <b>87</b>                                | 63                | 36                 |
| 84   | <i>Firmicutes</i>     | <i>Clostridiaceae</i> 1   | <i>Cand. Savagella</i> -related | 56                  | 0.2                           | 64.9            | 0.2                                     | 67                                       | 38                | <b>82</b>          |
| 85   | <i>Proteobacteria</i> | <i>Rhodocyclaceae</i> 2   | Uncultured                      | 36                  | 0.2                           | 65.0            | 0.2                                     | 33                                       | <b>88</b>         | <b>91</b>          |
| 86   | <i>Firmicutes</i>     | <i>Ruminococcaceae</i>    | Termite cluster                 | 84                  | 0.2                           | 65.2            | 0.3                                     | 60                                       | <b>88</b>         | <b>73</b>          |
| 87   | <i>Proteobacteria</i> | Cluster 1                 | Higher termite cluster          | 129                 | 0.2                           | 65.4            | 0.2                                     | 7                                        | 50                | <b>100</b>         |
| 88   | <i>Bacteroidetes</i>  | <i>Rikenellaceae</i>      | Insect Cluster                  | 2                   | 0.2                           | 65.5            | 0.3                                     | 53                                       | <b>100</b>        | <b>91</b>          |

| Rank | Phylum                | Family                    | Genus level            | No. of OTUs<br>(3%) | Contribution (%) <sup>a</sup> |                 | Read<br>abund-<br>ance (%) <sup>b</sup> | Representation in hosts (%) <sup>c</sup> |                   |                    |
|------|-----------------------|---------------------------|------------------------|---------------------|-------------------------------|-----------------|-----------------------------------------|------------------------------------------|-------------------|--------------------|
|      |                       |                           |                        |                     | Indivi-<br>dual               | Cumula-<br>tive |                                         | Cock-<br>roaches                         | Lower<br>termites | Higher<br>termites |
| 89   | <i>Bacteroidetes</i>  | <i>Rikenellaceae</i>      | RC9                    | 25                  | 0.2                           | 65.7            | 0.2                                     | <b>80</b>                                | 38                | 18                 |
| 90   | <i>Actinobacteria</i> | <i>Nakamurellaceae</i>    | <i>Nakamurella</i>     | 2                   | 0.2                           | 65.9            | 0.1                                     | 0                                        | 0                 | 9                  |
| 91   | <i>Firmicutes</i>     | <i>Ruminococcaceae</i>    | Incertae Sedis 4       | 1                   | 0.2                           | 66.0            | 0.4                                     | <b>93</b>                                | <b>88</b>         | <b>91</b>          |
| 92   | <i>Planctomycetes</i> | <i>Planctomycetaceae</i>  | Termite cluster        | 85                  | 0.2                           | 66.2            | 0.3                                     | <b>87</b>                                | 50                | <b>73</b>          |
| 93   | <i>Lentisphaerae</i>  | <i>Victivallaceae</i>     | <i>Victivallis</i>     | 70                  | 0.2                           | 66.4            | 0.3                                     | <b>87</b>                                | 38                | 36                 |
| 94   | <i>Firmicutes</i>     | <i>Peptococcaceae</i>     | <i>Desulfitibacter</i> | 35                  | 0.2                           | 66.5            | 0.1                                     | 33                                       | 50                | 64                 |
| 95   | <i>Bacteroidetes</i>  | <i>Rikenellaceae</i>      | Gut cluster c          | 89                  | 0.2                           | 66.7            | 0.3                                     | <b>93</b>                                | 38                | 55                 |
| 96   | <i>Firmicutes</i>     | <i>Leuconostocaceae</i>   | <i>Weissella</i> 1     | 5                   | 0.2                           | 66.8            | 0.1                                     | 40                                       | 25                | 9                  |
| 97   | <i>Proteobacteria</i> | <i>Enterobacteriaceae</i> | <i>Morganella</i>      | 1                   | 0.2                           | 67.0            | 0.1                                     | 0                                        | 0                 | 0                  |
| 98   | <i>Firmicutes</i>     | <i>Leuconostocaceae</i>   | <i>Leuconostoc</i>     | 2                   | 0.2                           | 67.2            | 0.1                                     | 20                                       | 13                | 0                  |
| 99   | <i>Bacteroidetes</i>  | <i>Rikenellaceae</i>      | Insect cluster 2       | 2                   | 0.2                           | 67.3            | 0.3                                     | 67                                       | <b>75</b>         | <b>91</b>          |
| 100  | <i>Bacteroidetes</i>  | Insect custer II          | uncultured b           | 81                  | 0.2                           | 67.5            | 0.2                                     | 13                                       | 25                | 64                 |
| 119  | <i>Firmicutes</i>     | <i>Enterococcaceae</i>    | <i>Enterococcus</i> 4  | 2                   | 0.1                           | 70.0            | 0.1                                     | 47                                       | 25                | 9                  |

| Rank | Phylum                | Family                   | Genus level          | No. of OTUs<br>(3%) | Contribution (%) <sup>a</sup> |                 | Read<br>abund-<br>ance (%) <sup>b</sup> | Representation in hosts (%) <sup>c</sup> |                   |                    |
|------|-----------------------|--------------------------|----------------------|---------------------|-------------------------------|-----------------|-----------------------------------------|------------------------------------------|-------------------|--------------------|
|      |                       |                          |                      |                     | Indivi-<br>dual               | Cumula-<br>tive |                                         | Cock-<br>roaches                         | Lower<br>termites | Higher<br>termites |
| 320  | <i>Acidobacteria</i>  | <i>Acidobacteriaceae</i> | Uncultured 5         | 1                   | <0.1                          | 80.0            | 0.0                                     | 53                                       | <b>100</b>        | 55                 |
| 598  | <i>Proteobacteria</i> | <i>Comamonadaceae</i>    | <i>Ottowia</i>       | 2                   | <0.1                          | 90.0            | 0.0                                     | 47                                       | <b>75</b>         | <b>91</b>          |
| 884  | <i>Proteobacteria</i> | <i>Desulfarculaceae</i>  | <i>Desulfarculus</i> | 21                  | <0.1                          | 100.0           | 0.0                                     | 0                                        | 13                | 9                  |

<sup>a</sup> The contribution to the overall clustering in a PCA analysis, expressed as the fraction of the total variance explained by this particular genus.

<sup>b</sup> Fraction of reads in all samples belonging to a particular taxon (normalized samples).

<sup>c</sup> To increase sensitivity, datasets were not subsampled for the core analysis.
